# Supplementary material for: Photopolymerization of Limonene Dioxide and Vegetable Oils as Biobased 3D-Printing Stereolithographic Formulation
Source: MDPI journal article supplement (doi:10.3390/polym16070965), 2024-04-02
Supplement: s1 [file s1]

## Supplementary Materials

# Photopolymerization of Limonene Dioxide and Vegetable Oils as Biobased 3D-Printing Stereolithographic Formulation

Megane Clerget<sup>1,2</sup>, Eric Gagnon<sup>2\*</sup>, Jerome P. Claverie<sup>1\*</sup>

1: Université de Sherbrooke 2500 Boul. De l'Université, Sherbrooke, Qc, Canada, J1K 2R1

2: Soprema Canada, 1688 rue Jean Berchmans Michaud, Drummondville, Qc, Canada, J2C 8E9

### Figures

|                                                                                                                                                                                                                 |    |
|-----------------------------------------------------------------------------------------------------------------------------------------------------------------------------------------------------------------|----|
| Figure S 1 FTIR spectrum of the LDO/PAG mixture depending on the isomers cis-trans of LDO used (PAG = 0.1 wt%, 1 minute irradiation, 60% relative humidity).....                                                | 3  |
| Figure S 2 FTIR spectrum of LDO-ELO (50 wt%) mixture before and after photocationic polymerization (PAG = 1 wt%, 1 minute irradiation, 60% relative humidity).....                                              | 4  |
| Figure S 3 FTIR spectrum of LDO/PAG mixture with variation of the PAG concentration (1 minute irradiation, 60% relative humidity).....                                                                          | 4  |
| Figure S 4 Sample of LDO/PAG mixture, polymerized at ambient temperature (PAG = 0.1 wt%, 1 minute irradiation, 60% relative humidity).....                                                                      | 5  |
| Figure S 5 FTIR spectrum of LDO/PAG mixture with variation of irradiation time (PAG = 0.1 wt%, 60% relative humidity).....                                                                                      | 5  |
| Figure S 6 FTIR spectrum of LDO/PAG mixture with variation of humidity (PAG = 0.1 wt%, 1 minute irradiation).....                                                                                               | 6  |
| Figure S 7 FTIR spectrum of (a) LDO/ESO and (b) LDO/ELO mixtures at different concentration (%wt) before and after photocationic polymerization (PAG = 1 wt%, 1 minute irradiation, 60% relative humidity)..... | 6  |
| Figure S 8 Tan $\delta$ curves by DMTA for the crosslinked epoxy films after photocationic polymerization. (a) LDO/ESO and (b) LDO/ELO mixture (PAG = 1 wt%, 1 minute irradiation, 60% relative humidity).....  | 8  |
| Figure S 9 Schematic principle of stereolithography.....                                                                                                                                                        | 8  |
| Figure S 10 Picture by optical microscope (DPM 300 from BYK); 3D printed resins LDO/AESO/TMPTA 18/66/16 %wt (0,5%wt of BAPO); (a) without PAG; (b) with 0,5%wt of PAG. ....                                     | 9  |
| Figure S 11 FTIR spectrum of LDO/AESO/TMPTA mixtures (wt%) before and after 3D printing (0.5 wt% BAPO, 0.5 wt% PAG).....                                                                                        | 10 |
| Figure S 12 FTIR spectrum of LDO/AESO/TMPTA mixtures 18/66/16 %wt before 3D printing, after 3D printing, and with a thermal postcure.....                                                                       | 11 |

## Tables

|                                                                                                                                                                                                                                                   |    |
|---------------------------------------------------------------------------------------------------------------------------------------------------------------------------------------------------------------------------------------------------|----|
| Table S 1 Storage modulus, loss modulus, at different temperature, by DMTA for LDO/ESO and LDO/ELO mixtures at different concentration (%wt) after photocationic polymerization (PAG = 1 wt%, 1 minute irradiation, 60% relative humidity). ..... | 7  |
| Table S 2 Swelling tests in methanol for the mixture LDO/AESO/TMPTA printed by stereolithography...                                                                                                                                               | 10 |

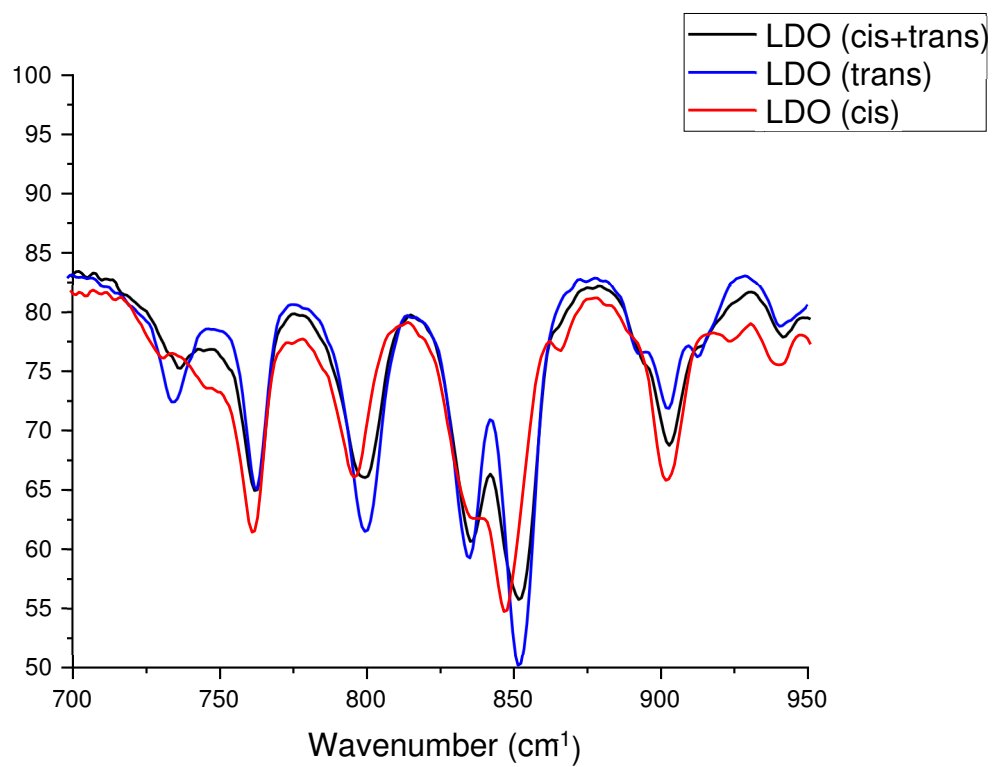

*Figure S 1 FTIR spectrum of the LDO/PAG mixture depending on the isomers cis-trans of LDO used (PAG = 0.1 wt%, 1 minute irradiation, 60% relative humidity). The intensities are absolute (no normalization)*

In order to compare FTIR spectra in between them, spectra were normalized by the band at  $2950\text{ cm}^{-1}$  (see Figure S2). This procedure is justified by the fact that the concentration of C-H bonds remains unchanged during the polymerization. Once normalized, the absolute y scale is arbitrary but samples become comparable to each other.

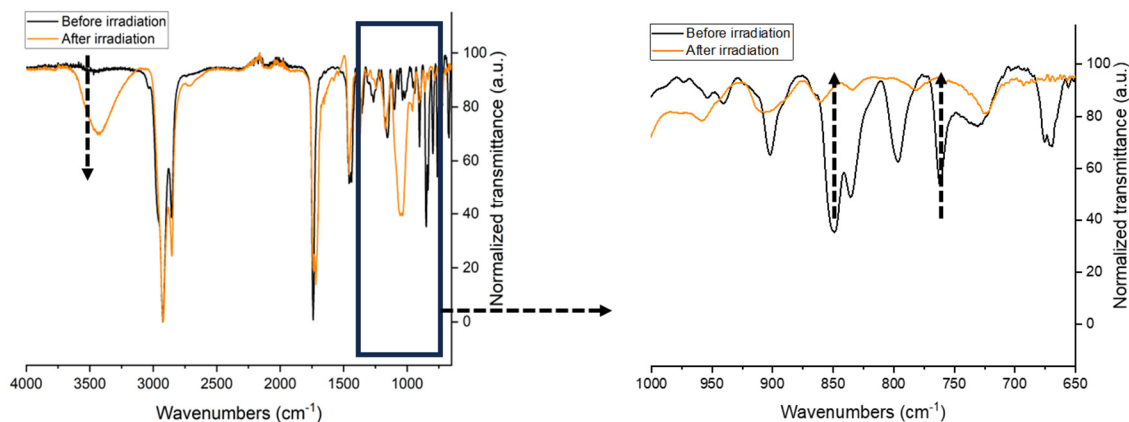

Figure S 2 FTIR spectrum of LDO-ELO (50 wt%) mixture before and after photocationic polymerization (PAG = 1 wt%, 1 minute irradiation, 60% relative humidity). The intensities have been normalized to the band at  $2950\text{ cm}^{-1}$  (vertical scale is arbitrary).

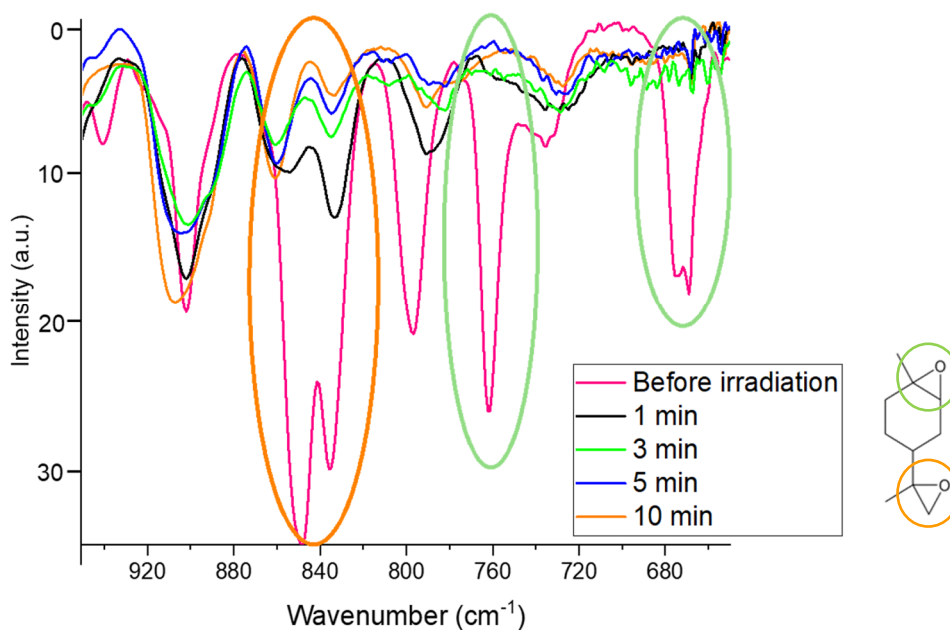

Figure S 3 FTIR spectrum of LDO/PAG mixture with variation of the PAG concentration (1 minute irradiation, 60% relative humidity). The intensities have been normalized to the band at  $2950\text{ cm}^{-1}$  (vertical scale is arbitrary).

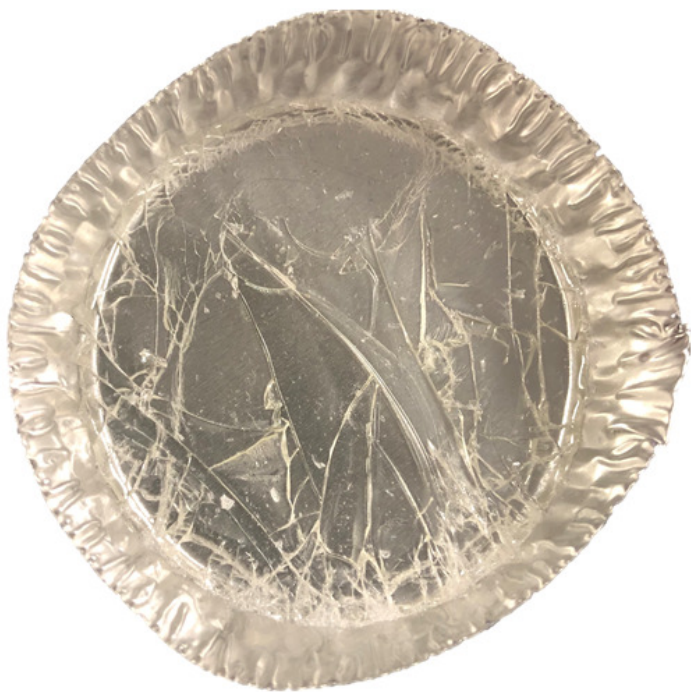

Figure S 4 Sample of LDO/PAG mixture in an aluminum dish, polymerized at ambient temperature (PAG = 0.1 wt%, 1 minute irradiation, 60% relative humidity).

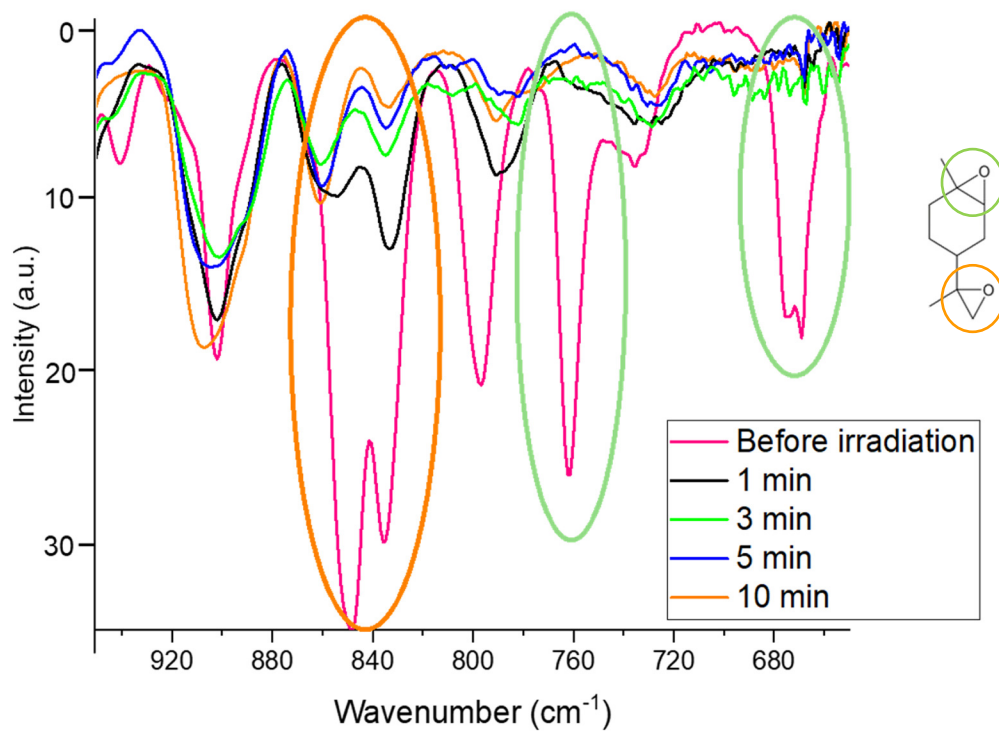

Figure S 5 FTIR spectrum of LDO/PAG mixture with variation of irradiation time (PAG = 0.1 wt%, 60% relative humidity). The intensities have been normalized to the band at  $2950 \text{ cm}^{-1}$  (vertical scale is arbitrary).

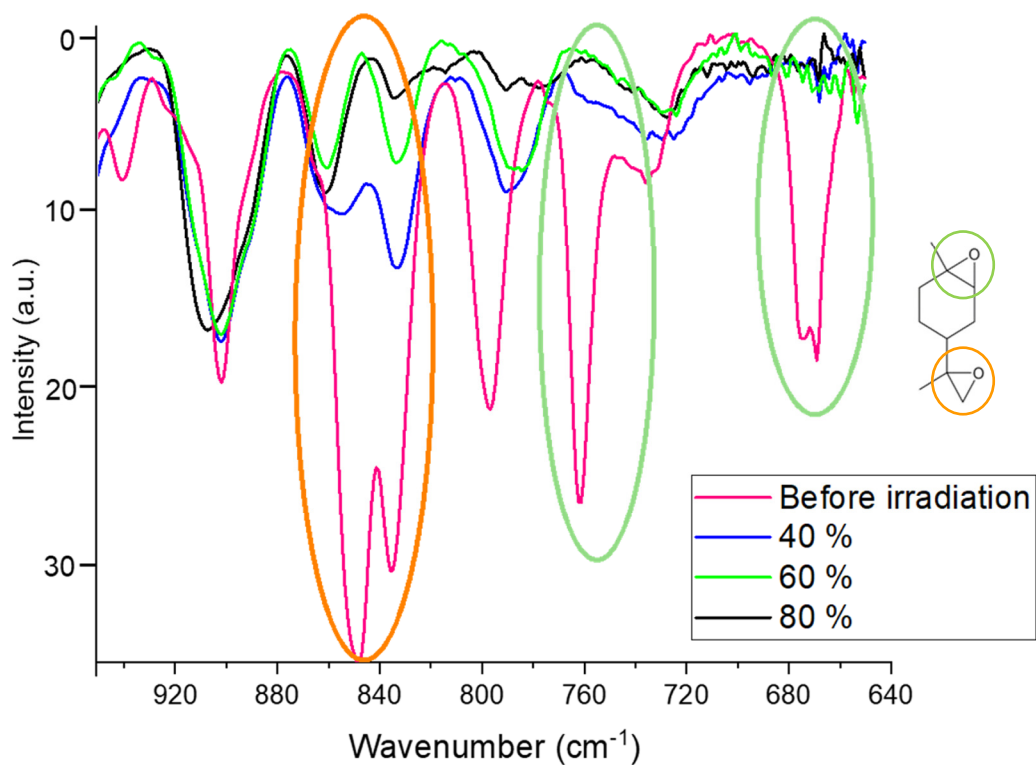

Figure S 6 FTIR spectrum of LDO/PAG mixture with variation of humidity (PAG = 0.1 wt%, 1 minute irradiation). The intensities have been normalized to the band at 2950  $\text{cm}^{-1}$  (vertical scale is arbitrary).

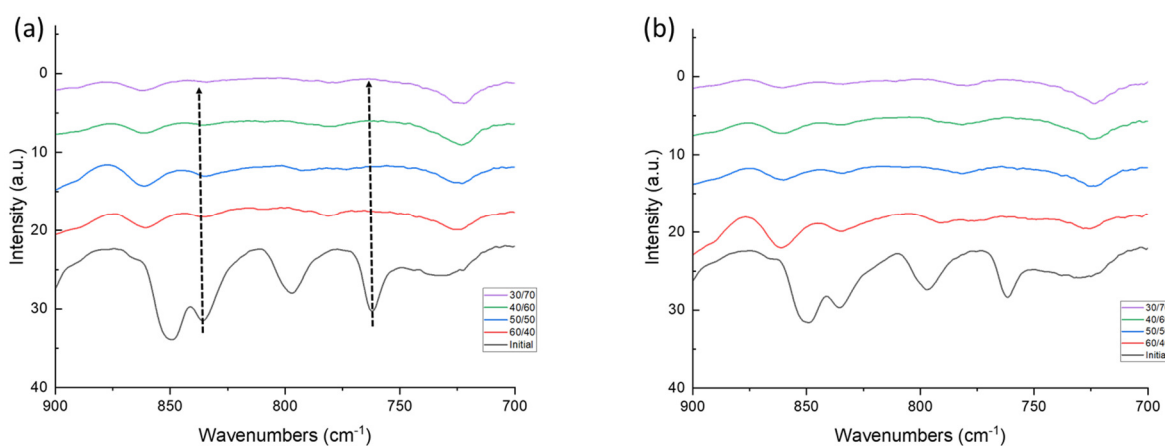

Figure S 7 FTIR spectrum of (a) LDO/ESO and (b) LDO/ELO mixtures at different concentrations (%wt) before and after photocationic polymerization (PAG = 1 wt%, 1 minute irradiation, 60% relative humidity). The intensities have been normalized to the band at 2950  $\text{cm}^{-1}$  (vertical scale is arbitrary). Note that the spectra have been vertically offset for the sake of clarity.

Table S 1 Storage modulus, loss modulus, at different temperature, by DMTA for LDO/ESO and LDO/ELO mixtures at different concentration (%wt) after photocationic polymerization (PAG = 1 wt%, 1 minute irradiation, 60% relative humidity).

| Formulation                        | -30°C                 |                    | 0°C                   |                    | 25°C                  |                    |
|------------------------------------|-----------------------|--------------------|-----------------------|--------------------|-----------------------|--------------------|
|                                    | Storage modulus (MPa) | Loss modulus (MPa) | Storage modulus (MPa) | Loss modulus (MPa) | Storage modulus (MPa) | Loss modulus (MPa) |
| <b>LDO/ESO<br/>30/70<br/>(wt%)</b> | 1244±20               | 62±1               | 176±14                | 102±1              | 2±1                   | 2±1                |
| <b>LDO/ESO<br/>40/60<br/>(wt%)</b> | 1581±22               | 94±1               | 390±21                | 162±3              | 3±1                   | 4±1                |
| <b>LDO/ESO<br/>50/50<br/>(wt%)</b> | 874±16                | 65±1               | 234±16                | 93±1               | 4±2                   | 5±1                |
| <b>LDO/ELO<br/>30/70<br/>(wt%)</b> | 1070±18               | 84±2               | 840±26                | 87±1               | 71±13                 | 47±6               |
| <b>LDO/ELO<br/>40/60<br/>(wt%)</b> | 1103±12               | 28±1               | 793±24                | 70±1               | 121±21                | 74±4               |
| <b>LDO/ELO<br/>50/50<br/>(wt%)</b> | 933±15                | 32±1               | 754±17                | 71±1               | 255±26                | 114±11             |

(a)

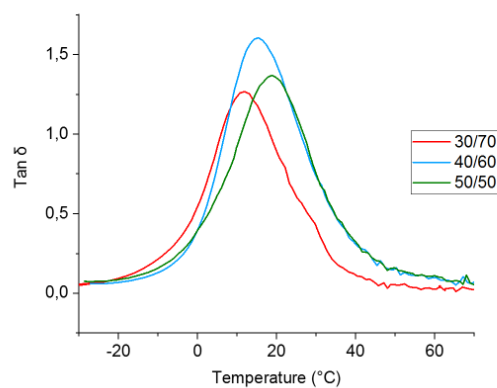

(b)

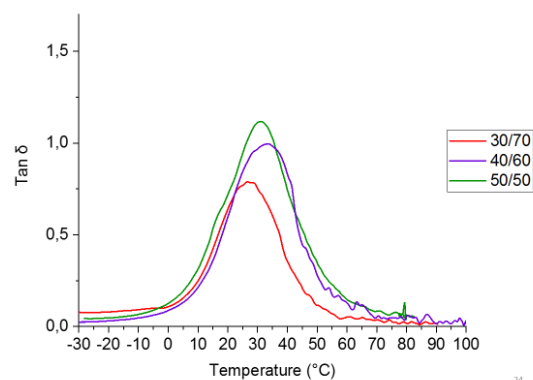

Figure S 8 Tan  $\delta$  curves by DMTA for the crosslinked epoxy films after photocationic polymerization. (a) LDO/ESO and (b) LDO/ELO mixture (PAG = 1 wt%, 1 minute irradiation, 60% relative humidity).

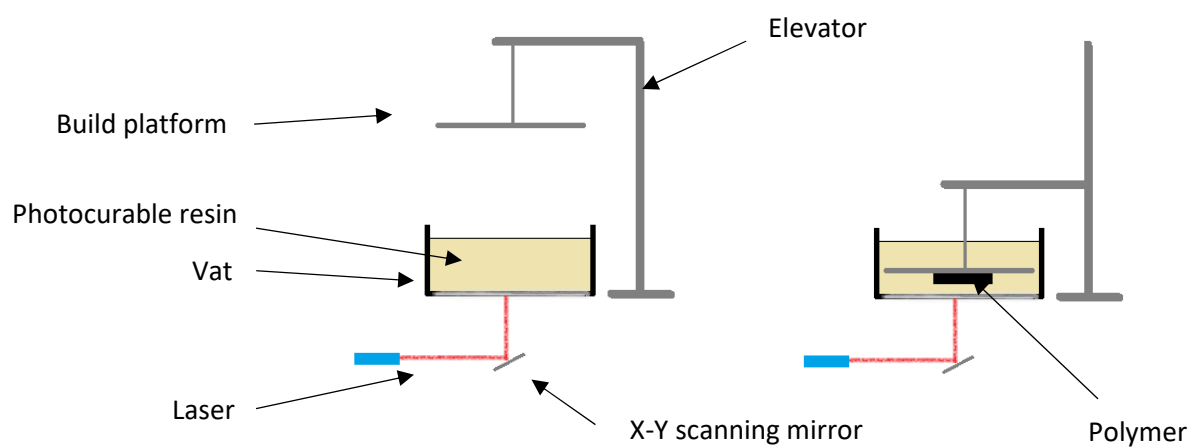

Figure S 9 Schematic principle of stereolithography.



(a)

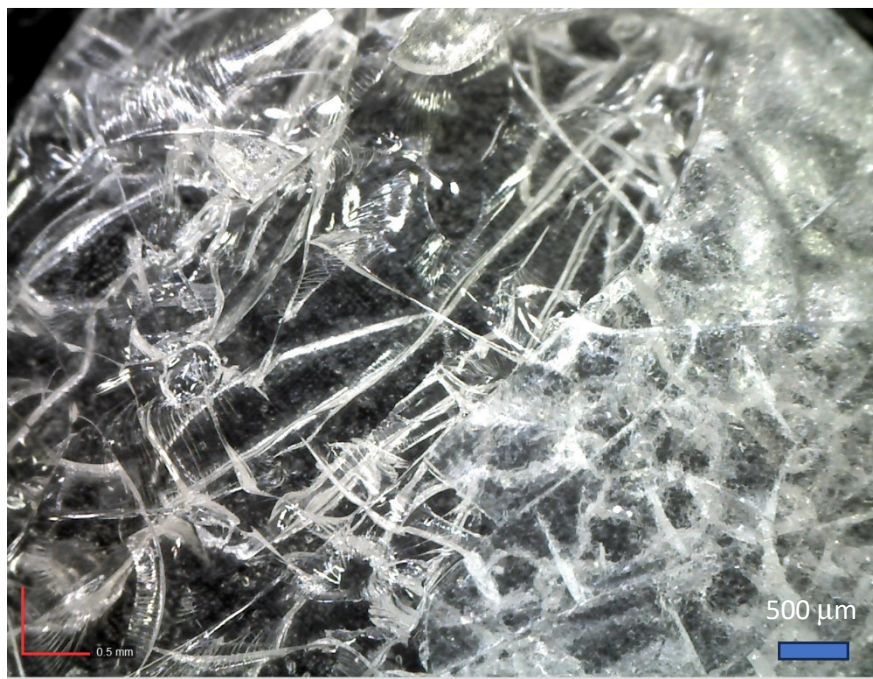

(b)

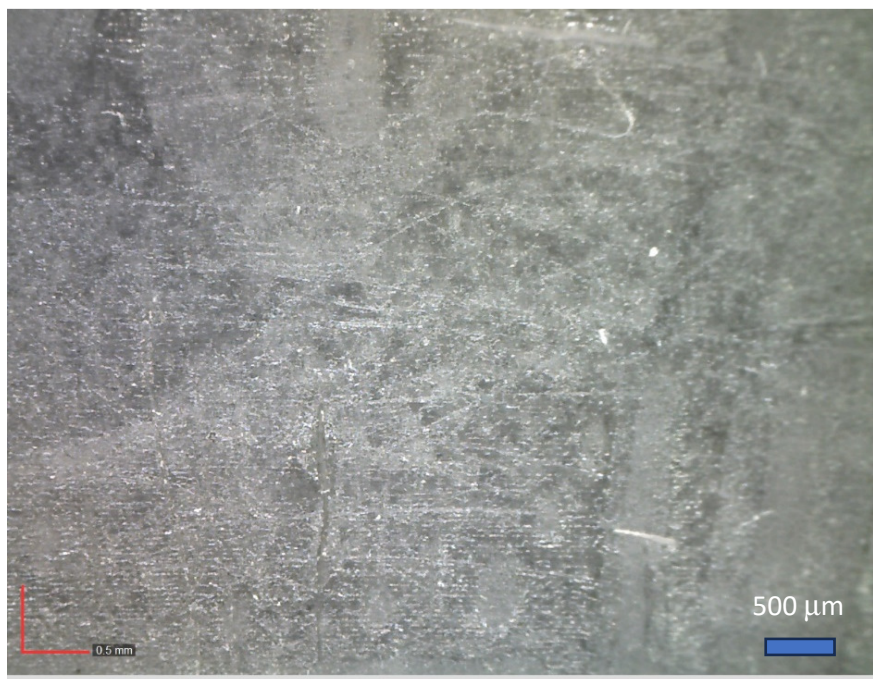

Figure S 10 Picture by optical microscope (DPM 300 from BYK); 3D printed resins LDO/AESO/TMPTA 18/66/16 %wt (0,5%wt of BAPO); (a) without PAG; (b) with 0,5%wt of PAG.

Table S 2 Swelling tests in methanol for the mixture LDO/AESO/TMPTA printed by stereolithography.

| LDO/AESO/TMPTA<br>(wt%) | Swelling in MeOH (%) |
|-------------------------|----------------------|
| 53/38/9                 | 15.1                 |
| 31/56/13                | 10.8                 |
| 18/66/16                | 3.6                  |
| 18/66/16 <sup>1</sup>   | 2.4                  |

1. curing for 30 minutes at 80°C.

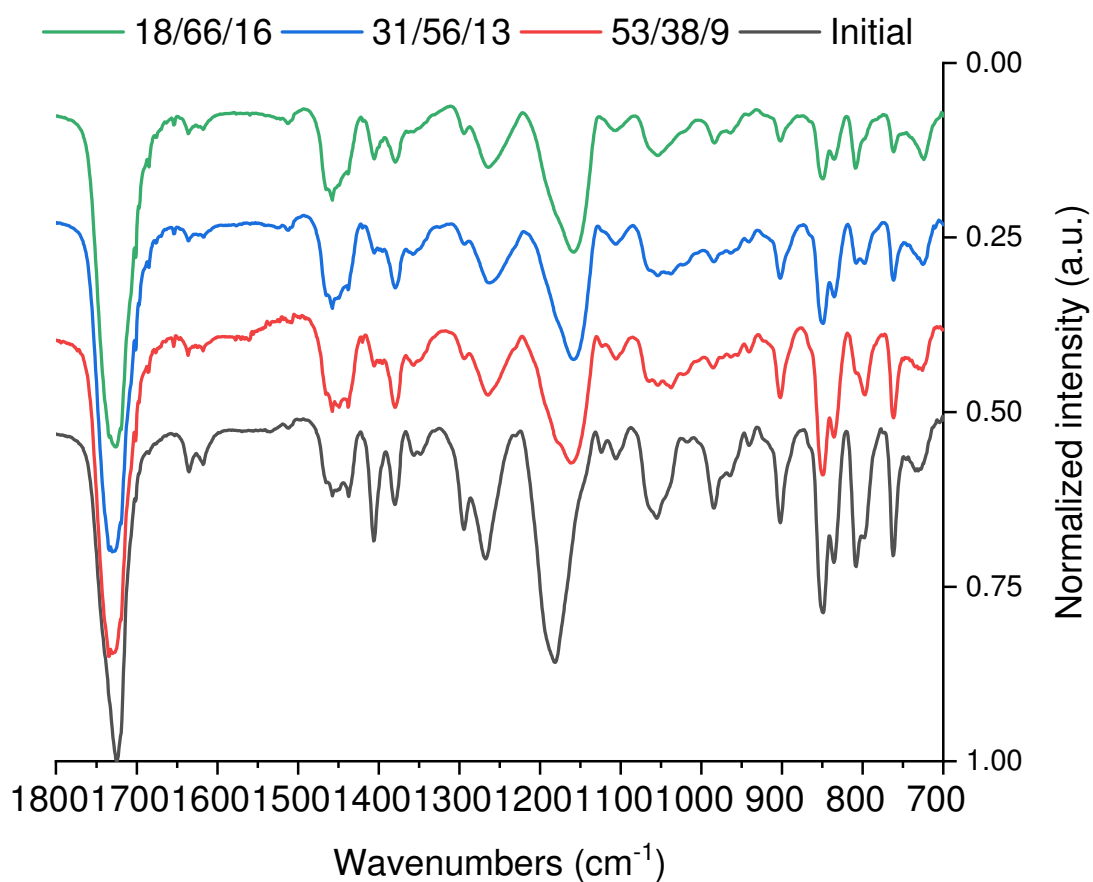

Figure S 11 FTIR spectrum of LDO/AESO/TMPTA mixtures (wt%) before and after 3D printing (0.5 wt% BAPO, 0.5 wt% PAG). The intensities have been normalized to the band at 2950  $\text{cm}^{-1}$  (vertical scale is arbitrary). Note that the spectra have been vertically offset for the sake of clarity.

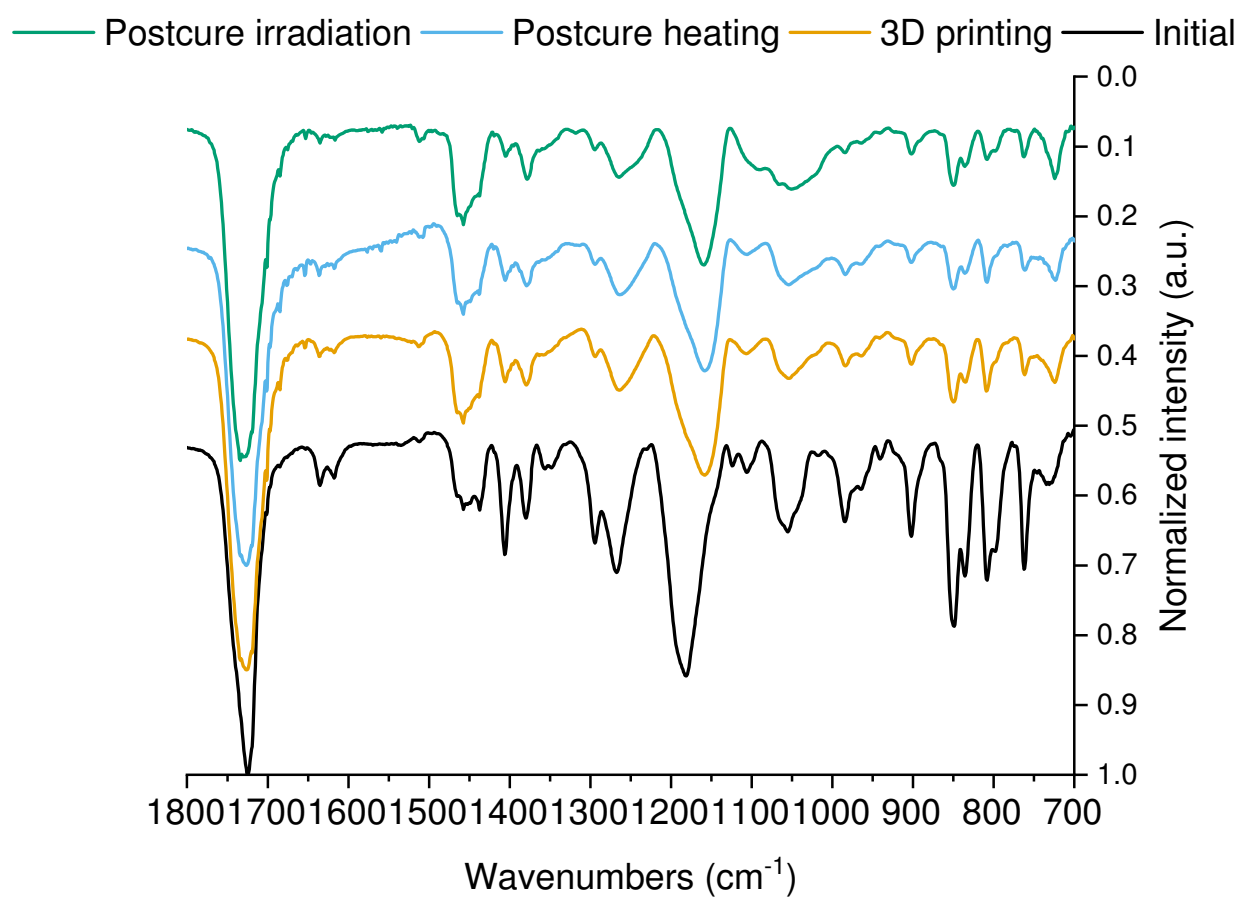

Figure S 12 FTIR spectrum of LDO/AESO/TMPTA mixtures 18/66/16 %wt before 3D printing, after 3D printing, and with a thermal postcure. The intensities have been normalized to the band at 2950  $\text{cm}^{-1}$  (vertical scale is arbitrary). Note that the spectra have been vertically offset for the sake of clarity.
